# Supplementary material for: SeLOX—a locus of recombination site search tool for the detection and directed evolution of site-specific recombination systems
Source: PubMed Central journal article supplement — Nucleic Acids Res. 2010 Jun 6;38(Web Server issue):W293–8. doi: 10.1093/nar/gkq523 (PMC2896191; doi:10.1093/nar/gkq523), 2010-06-06
Supplement: gkq523_1.pdf [file gkq523_1.pdf]

**Supplemental Figure S1:** SeLOX output of the search for loxP/loxH and rox – like sites (Suppl. File 1) in 8 HIV-LTR sequences (Suppl. File 2). 5 mutations were allowed in the flanking region and 8 mismatches for the symmetry.

**Supplemental Figure S2:** SeLOX output of the search for three yeast-like recombinases with conserved target sites (Suppl. File 1, bold letters) in 8 HIV-LTR sequences (Suppl. File 2). 5 mutations were allowed in the flanking region and 8 mismatches for the symmetry.
