# Supplementary material for: SeLOX—a locus of recombination site search tool for the detection and directed evolution of site-specific recombination systems
Source: PubMed Central journal article supplement — Nucleic Acids Res. 2010 Jun 6;38(Web Server issue):W293–8. doi: 10.1093/nar/gkq523 (PMC2896191; doi:10.1093/nar/gkq523), 2010-06-06
Supplement: gkq523_2.pdf [file gkq523_2.pdf]

# SeLOX

A search tool for recombinase lox-like target sites

[Home](#)

[Workflow](#)

[About](#)

[Sample Data](#)

[Contact](#)

## You looked for

A<sub>T</sub> | A<sub>T</sub> | A | ATC | ATC | T | A<sub>T</sub> | A<sub>C</sub> | A<sub>G</sub> | A<sub>T</sub> | A<sub>T</sub> | A<sub>T</sub> | A

## 252 lox-like Sequences found :

Dots on top of the nucleotides indicate mismatches with the query pattern, those right of the spacer being reverse complement mismatches. Dots below nucleotides indicate asymmetry in the right arm of the lox-site to the corresponding positions on the left arm of the lox-site

AAAG<sup>•</sup>TT<sup>•</sup>CCAG<sup>•</sup>A<sup>•</sup>GA AGTTCTC TCGAC<sup>•</sup>GCAGG<sup>•</sup>ACT

6 strains Score : 5.32

gi|13897568|gb|AF254674.1| HIV-1 clone NT3.3/ from Tanzania 5' long terminal repeat, complete sequence  
gi|13897569|gb|AF254675.1| HIV-1 clone NT4.3/ from Tanzania 5' long terminal repeat, complete sequence  
gi|13897588|gb|AF254694.1| HIV-1 clone NT25.4/ from Tanzania 5' long terminal repeat, complete sequence  
gi|13897608|gb|AF254714.1| HIV-1 clone NT51/.17 from Tanzania 5' long terminal repeat, complete sequence  
gi|13897627|gb|AF254733.1| HIV-1 clone B66.1/ from Tanzania 5' long terminal repeat, complete sequence  
gi|88853341:1-750 Human immunodeficiency virus type 1 complete genome, subtype A4, isolate 97CD.KCC2

AAC<sup>•</sup>CTCAGAT<sup>•</sup>GC TGCATA TAAG<sup>•</sup>CAGCTG<sup>•</sup>CTT

6 strains Score : 1.3

gi|4336542|gb|AF096641.1| HIV-1 strain TZB0003 country Tanzania 5' long terminal repeat, complete sequence  
gi|13897569|gb|AF254675.1| HIV-1 clone NT4.3/ from Tanzania 5' long terminal repeat, complete sequence  
gi|13897588|gb|AF254694.1| HIV-1 clone NT25.4/ from Tanzania 5' long terminal repeat, complete sequence  
gi|13897627|gb|AF254733.1| HIV-1 clone B66.1/ from Tanzania 5' long terminal repeat, complete sequence  
gi|13897630|gb|AF254736.1| HIV-1 clone B36.2/ from Tanzania 5' long terminal repeat, complete sequence  
gi|88853341:1-750 Human immunodeficiency virus type 1 complete genome, subtype A4, isolate 97CD.KCC2

AAAGTTCCAGAGA AGTTCTC TCGACGCAGGACT

**AGGGACTCGAAAG CGAAAG T'TCCAGAGAAG'T'**

5 strains Score : 0.66

gi|13897568|gb|AF254674.1| HIV-1 clone NT3.3/ from Tanzania 5' long terminal repeat, complete sequence  
gi|13897588|gb|AF254694.1| HIV-1 clone NT25.4/ from Tanzania 5' long terminal repeat, complete sequence  
gi|13897608|gb|AF254714.1| HIV-1 clone NT51/.17 from Tanzania 5' long terminal repeat, complete sequence  
gi|13897627|gb|AF254733.1| HIV-1 clone B66.1/ from Tanzania 5' long terminal repeat, complete sequence  
gi|13897630|gb|AF254736.1| HIV-1 clone B36.2/ from Tanzania 5' long terminal repeat, complete sequence

---

**ATTACACCCTATA TGCCAACATG GAATGGATGATGA**

4 strains Score : 3.66

gi|4336542|gb|AF096641.1| HIV-1 strain TZB0003 country Tanzania 5' long terminal repeat, complete sequence  
gi|13897568|gb|AF254674.1| HIV-1 clone NT3.3/ from Tanzania 5' long terminal repeat, complete sequence  
gi|13897608|gb|AF254714.1| HIV-1 clone NT51/.17 from Tanzania 5' long terminal repeat, complete sequence  
gi|13897630|gb|AF254736.1| HIV-1 clone B36.2/ from Tanzania 5' long terminal repeat, complete sequence

---

**TTACACCCTATAT GCCAACATG GAATGGATGATGA**

4 strains Score : 2.3

gi|4336542|gb|AF096641.1| HIV-1 strain TZB0003 country Tanzania 5' long terminal repeat, complete sequence  
gi|13897568|gb|AF254674.1| HIV-1 clone NT3.3/ from Tanzania 5' long terminal repeat, complete sequence  
gi|13897608|gb|AF254714.1| HIV-1 clone NT51/.17 from Tanzania 5' long terminal repeat, complete sequence  
gi|13897630|gb|AF254736.1| HIV-1 clone B36.2/ from Tanzania 5' long terminal repeat, complete sequence

---

**AGGGACTCGAAAG CGAAAGTT CCAGAGAAGTTCT**

4 strains Score : 1.66

gi|13897568|gb|AF254674.1| HIV-1 clone NT3.3/ from Tanzania 5' long terminal repeat, complete sequence  
gi|13897588|gb|AF254694.1| HIV-1 clone NT25.4/ from Tanzania 5' long terminal repeat, complete sequence  
gi|13897608|gb|AF254714.1| HIV-1 clone NT51/.17 from Tanzania 5' long terminal repeat, complete sequence  
gi|13897627|gb|AF254733.1| HIV-1 clone B66.1/ from Tanzania 5' long terminal repeat, complete sequence

---

**ACACCCTATATGC CAACATG GAATGGATGATGA**

4 strains Score : 1.3

gi|4336542|gb|AF096641.1| HIV-1 strain TZB0003 country Tanzania 5' long terminal repeat, complete sequence  
gi|13897568|gb|AF254674.1| HIV-1 clone NT3.3/ from Tanzania 5' long terminal repeat, complete sequence  
gi|13897608|gb|AF254714.1| HIV-1 clone NT51/.17 from Tanzania 5' long terminal repeat, complete sequence  
gi|13897630|gb|AF254736.1| HIV-1 clone B36.2/ from Tanzania 5' long terminal repeat, complete sequence

---

**TTACAC<sup>•</sup>CC<sup>•</sup>TATAT<sup>•</sup> GCCAACAT GGAATGGATGATG<sup>•</sup>**

4 strains Score : 0.96

gi|4336542|gb|AF096641.1| HIV-1 strain TZB0003 country Tanzania 5' long terminal repeat, complete sequence  
gi|13897568|gb|AF254674.1| HIV-1 clone NT3.3/ from Tanzania 5' long terminal repeat, complete sequence  
gi|13897608|gb|AF254714.1| HIV-1 clone NT51/.17 from Tanzania 5' long terminal repeat, complete sequence  
gi|13897630|gb|AF254736.1| HIV-1 clone B36.2/ from Tanzania 5' long terminal repeat, complete sequence

---

**TATTACAC<sup>•</sup>CC<sup>•</sup>TAT<sup>•</sup> ATGCCA ACATGGAATGGAT<sup>•</sup>**

4 strains Score : 0.3

gi|4336542|gb|AF096641.1| HIV-1 strain TZB0003 country Tanzania 5' long terminal repeat, complete sequence  
gi|13897568|gb|AF254674.1| HIV-1 clone NT3.3/ from Tanzania 5' long terminal repeat, complete sequence  
gi|13897608|gb|AF254714.1| HIV-1 clone NT51/.17 from Tanzania 5' long terminal repeat, complete sequence  
gi|13897630|gb|AF254736.1| HIV-1 clone B36.2/ from Tanzania 5' long terminal repeat, complete sequence

---

**TATTACAC<sup>•</sup>CC<sup>•</sup>TAT<sup>•</sup> ATGCCAACAT GGAATGGATGATG<sup>•</sup>**

4 strains Score : -1.38

gi|4336542|gb|AF096641.1| HIV-1 strain TZB0003 country Tanzania 5' long terminal repeat, complete sequence  
gi|13897568|gb|AF254674.1| HIV-1 clone NT3.3/ from Tanzania 5' long terminal repeat, complete sequence  
gi|13897608|gb|AF254714.1| HIV-1 clone NT51/.17 from Tanzania 5' long terminal repeat, complete sequence  
gi|13897630|gb|AF254736.1| HIV-1 clone B36.2/ from Tanzania 5' long terminal repeat, complete sequence

---

**ACAACAGC<sup>•</sup>CTATT<sup>•</sup> ACACCC TATATGCCAACAT<sup>•</sup>**

3 strains Score : 4.34

gi|13897568|gb|AF254674.1| HIV-1 clone NT3.3/ from Tanzania 5' long terminal repeat, complete sequence  
gi|13897608|gb|AF254714.1| HIV-1 clone NT51/.17 from Tanzania 5' long terminal repeat, complete sequence  
gi|13897630|gb|AF254736.1| HIV-1 clone B36.2/ from Tanzania 5' long terminal repeat, complete sequence

sequence

---

**GAACAACAGCCTA TTACACCCTA TATGCCAACATGG**

3 strains Score : 3.98

gi|13897568|gb|AF254674.1| HIV-1 clone NT3.3/ from Tanzania 5' long terminal repeat, complete sequence

gi|13897608|gb|AF254714.1| HIV-1 clone NT51/17 from Tanzania 5' long terminal repeat, complete sequence

gi|13897630|gb|AF254736.1| HIV-1 clone B36.2/ from Tanzania 5' long terminal repeat, complete sequence

---

**CTGCTTAAGCCTC AATAAAGC TTGCCTTGAGTGC**

3 strains Score : 0.96

gi|13897568|gb|AF254674.1| HIV-1 clone NT3.3/ from Tanzania 5' long terminal repeat, complete sequence

gi|13897569|gb|AF254675.1| HIV-1 clone NT4.3/ from Tanzania 5' long terminal repeat, complete sequence

gi|88853341:1-750 Human immunodeficiency virus type 1 complete genome, subtype A4, isolate 97CD.KCC2

---

**GATGCTGCATATA AGCAGCTGC TTTTCGCCTGTAC**

2 strains Score : 6.66

gi|13897569|gb|AF254675.1| HIV-1 clone NT4.3/ from Tanzania 5' long terminal repeat, complete sequence

gi|13897627|gb|AF254733.1| HIV-1 clone B66.1/ from Tanzania 5' long terminal repeat, complete sequence

---

**GATGCTGCATATA AGCAGCTGC TTTTCGCCTGTAC**

2 strains Score : 6.66

gi|13897588|gb|AF254694.1| HIV-1 clone NT25.4/ from Tanzania 5' long terminal repeat, complete sequence

gi|13897630|gb|AF254736.1| HIV-1 clone B36.2/ from Tanzania 5' long terminal repeat, complete sequence

---

CTATATGCCAACA TGG AATGG ATGATGAAGAGAG

2 strains Score : 4.98

gi|4336542|gb|AF096641.1| HIV-1 strain TZB0003 country Tanzania 5' long terminal repeat, complete sequence

gi|13897608|gb|AF254714.1| HIV-1 clone NT51/.17 from Tanzania 5' long terminal repeat, complete sequence

---

ATGCTGCATATAA GCAGCTGC TTTTCGCTTG TAC

2 strains Score : 4.64

gi|13897569|gb|AF254675.1| HIV-1 clone NT4.3/ from Tanzania 5' long terminal repeat, complete sequence

gi|13897627|gb|AF254733.1| HIV-1 clone B66.1/ from Tanzania 5' long terminal repeat, complete sequence

---

ATGCTGCATATAA GCAGCTGC TTTTCGCCTGTAC

2 strains Score : 4.64

gi|13897588|gb|AF254694.1| HIV-1 clone NT25.4/ from Tanzania 5' long terminal repeat, complete sequence

gi|13897630|gb|AF254736.1| HIV-1 clone B36.2/ from Tanzania 5' long terminal repeat, complete sequence

---

GATGCTGCATATA AGCAGC TGCTTTTCGCTTG

2 strains Score : 3.64

gi|13897569|gb|AF254675.1| HIV-1 clone NT4.3/ from Tanzania 5' long terminal repeat, complete sequence

gi|13897627|gb|AF254733.1| HIV-1 clone B66.1/ from Tanzania 5' long terminal repeat, complete sequence

---

TAACATTGGATG GTGCTT CAAGCTAGTACCA

2 strains Score : 2.98

gi|4336542|gb|AF096641.1| HIV-1 strain TZB0003 country Tanzania 5' long terminal repeat, complete sequence

gi|13897588|gb|AF254694.1| HIV-1 clone NT25.4/ from Tanzania 5' long terminal repeat, complete sequence

---

GAATGGATGATGA TGAGAGA GAAACATTAATGT

2 strains Score : 2.64

gi|13897568|gb|AF254674.1| HIV-1 clone NT3.3/ from Tanzania 5' long terminal repeat, complete sequence

gi|13897630|gb|AF254736.1| HIV-1 clone B36.2/ from Tanzania 5' long terminal repeat, complete sequence

---

**GAATGGATGATGA AGAGAGA GAAACATTAAATGT**

2 strains Score : 2.64

gi|4336542|gb|AF096641.1| HIV-1 strain TZB0003 country Tanzania 5' long terminal repeat, complete sequence

gi|13897569|gb|AF254675.1| HIV-1 clone NT4.3/ from Tanzania 5' long terminal repeat, complete sequence

---

**CCACTAACATTTG GATGGTGC TTCAAGCTAGTAC**

2 strains Score : 2.64

gi|4336542|gb|AF096641.1| HIV-1 strain TZB0003 country Tanzania 5' long terminal repeat, complete sequence

gi|13897588|gb|AF254694.1| HIV-1 clone NT25.4/ from Tanzania 5' long terminal repeat, complete sequence

---

**TAACTAGAGATCC CTCAGAC CACTCTAGACTGA**

2 strains Score : 1.3

gi|13897588|gb|AF254694.1| HIV-1 clone NT25.4/ from Tanzania 5' long terminal repeat, complete sequence

gi|13897630|gb|AF254736.1| HIV-1 clone B36.2/ from Tanzania 5' long terminal repeat, complete sequence

---

---

**TATATGCCAACAT GGAATGG ATGATGAAGAGAG**

2 strains Score : 0.3

gi|4336542|gb|AF096641.1| HIV-1 strain TZB0003 country Tanzania 5' long terminal repeat, complete sequence  
gi|13897608|gb|AF254714.1| HIV-1 clone NT51/.17 from Tanzania 5' long terminal repeat, complete sequence

---

**TGGATGATGAAGA GAGAGAAA CATTAAATGTGGAA**

2 strains Score : -0.7

gi|4336542|gb|AF096641.1| HIV-1 strain TZB0003 country Tanzania 5' long terminal repeat, complete sequence  
gi|13897569|gb|AF254675.1| HIV-1 clone NT4.3/ from Tanzania 5' long terminal repeat, complete sequence

---

**TATATGCCAACAT GGAATGG ATGATGATGAGAG**

2 strains Score : -1.7

gi|13897568|gb|AF254674.1| HIV-1 clone NT3.3/ from Tanzania 5' long terminal repeat, complete sequence  
gi|13897630|gb|AF254736.1| HIV-1 clone B36.2/ from Tanzania 5' long terminal repeat, complete sequence

---

**TATATGCCAACAT GGAATGGATG ATGATGAGAGAGA**

2 strains Score : -2.04

gi|13897568|gb|AF254674.1| HIV-1 clone NT3.3/ from Tanzania 5' long terminal repeat, complete sequence  
gi|13897630|gb|AF254736.1| HIV-1 clone B36.2/ from Tanzania 5' long terminal repeat, complete sequence

---

**GAAGCTGCATATA AGCAGCCGC TTTTCGCTTGTAC**

1 strains Score : 8.66

gi|13897608|gb|AF254714.1| HIV-1 clone NT51/.17 from Tanzania 5' long terminal repeat, complete sequence

---

**CAACATCCTATTA CACCCTA TATGCCAACATGG**

1 strains Score : 6.98

gi|4336542|gb|AF096641.1| HIV-1 strain TZB0003 country Tanzania 5' long terminal repeat, complete sequence

---

ATAACAACCTATT ACACCC TATATGCCAGCAT

1 strains Score : 6.68

gi|13897627|gb|AF254733.1| HIV-1 clone B66.1/ from Tanzania 5' long terminal repeat, complete sequence

---

GACGCTGCATATA AGCAGCCGC TTTTCGCCTGTAC

1 strains Score : 6.66

gi|13897568|gb|AF254674.1| HIV-1 clone NT3.3/ from Tanzania 5' long terminal repeat, complete sequence

---

ACAACATCCTATT ACACCC TATATGCCAACAT

1 strains Score : 5.68

gi|4336542|gb|AF096641.1| HIV-1 strain TZB0003 country Tanzania 5' long terminal repeat, complete sequence

---

GATGCTGCATATA AGCAGCTGC TTTGCGCCTGTAC

1 strains Score : 5.66

gi|4336542|gb|AF096641.1| HIV-1 strain TZB0003 country Tanzania 5' long terminal repeat, complete sequence

---

ATAGCCTCAATAA AGCTTGC CTTGAGTGCTTAA

1 strains Score : 5.66

gi|13897627|gb|AF254733.1| HIV-1 clone B66.1/ from Tanzania 5' long terminal repeat, complete sequence

---

AAAGTTCCGGAGA AGTTCTC TCGACGCAGGACT

1 strains Score : 5.66

gi|4336542|gb|AF096641.1| HIV-1 strain TZB0003 country Tanzania 5' long terminal repeat, complete sequence

---

AAGCCTCAATAAA GCTTGCC TTGAGTGA CTCAA

1 strains Score : 5.64

gi|4336542|gb|AF096641.1| HIV-1 strain TZB0003 country Tanzania 5' long terminal repeat, complete sequence

---



ACAACATCCTATT ACACCCTA TATGCCAACATGG

1 strains Score : 5.34

gi|4336542|gb|AF096641.1| HIV-1 strain TZB0003 country Tanzania 5' long terminal repeat, complete sequence

---

GATGCTGCATATA AGCAGCTGC TTTCTGCTTGTAC

1 strains Score : 5.32

gi|88853341:1-750 Human immunodeficiency virus type 1 complete genome, subtype A4, isolate 97CD.KCC2

---

AAAGTTCCAGAGA AGTTCCC TCGACGCAGGACT

1 strains Score : 5.32

gi|13897630|gb|AF254736.1| HIV-1 clone B36.2/ from Tanzania 5' long terminal repeat, complete sequence

---

AAAGCTTGCCTTG AGTGCT TAAAGTAGTGTGT

1 strains Score : 5.32

gi|13897627|gb|AF254733.1| HIV-1 clone B66.1/ from Tanzania 5' long terminal repeat, complete sequence

---

ATTCCCTCTAACA TTTGGATGG TGCTTCAAGTTAG

1 strains Score : 4.98

gi|88853341:1-750 Human immunodeficiency virus type 1 complete genome, subtype A4, isolate 97CD.KCC2

---

TAGCCTCAATAAA GCTTGCCTTG AGTGCTTAAAGTA

1 strains Score : 4.96

gi|13897627|gb|AF254733.1| HIV-1 clone B66.1/ from Tanzania 5' long terminal repeat, complete sequence

---

TCAAACACGTAGC CCGAGAGCTG CATCCGGAGTTCT

1 strains Score : 4.66

gi|13897569|gb|AF254675.1| HIV-1 clone NT4.3/ from Tanzania 5' long terminal repeat, complete sequence

---

GTACCCACTAACA TTTGGATGG TGCTTCAAGCTAG

1 strains Score : 4.64

gi|4336542|gb|AF096641.1| HIV-1 strain TZB0003 country Tanzania 5' long terminal repeat, complete sequence

---

ACAACAGCTTATT ACACCC TATATGCCAGCAT

1 strains Score : 4.34

gi|13897588|gb|AF254694.1| HIV-1 clone NT25.4/ from Tanzania 5' long terminal repeat, complete sequence

---

CTATGTGCCAACA TGGAATGG ATGATGAAGAGAG

1 strains Score : 4.32

gi|13897569|gb|AF254675.1| HIV-1 clone NT4.3/ from Tanzania 5' long terminal repeat, complete sequence

---

CTATCTAGGGGAC CCACTGCT TAAGCCTCAATAA

1 strains Score : 4.3

gi|13897568|gb|AF254674.1| HIV-1 clone NT3.3/ from Tanzania 5' long terminal repeat, complete sequence

---

CAAACCTGGCATTAGACACC TAGCCCGAGAGAT

1 strains Score : 4.3

gi|13897588|gb|AF254694.1| HIV-1 clone NT25.4/ from Tanzania 5' long terminal repeat, complete sequence

---

AAGCCTCAATAAA AGCTTGCC TTGAGTGCTTCAA

1 strains Score : 4.3

gi|88853341:1-750 Human immunodeficiency virus type 1 complete genome, subtype A4, isolate 97CD.KCC2

---

TAAAACACAGAGC CCTAGAGATG CATCCGGAGTTCT

1 strains Score : 3.98

gi|13897627|gb|AF254733.1| HIV-1 clone B66.1/ from Tanzania 5' long terminal repeat, complete sequence

---

TAAAACACAGAGC CAAAGAGCTG CATCCGGAGTTCT

1 strains Score : 3.98

gi|88853341:1-750 Human immunodeficiency virus type 1 complete genome, subtype A4, isolate 97CD.KCC2

---

GTTTCCACTAACA TTTGGATGG TGTTTCAAGCTAG

1 strains Score : 3.98

gi|13897627|gb|AF254733.1| HIV-1 clone B66.1/ from Tanzania 5' long terminal repeat, complete sequence

---

CTATATGCCAACA TGGAAATGGAT GATCCTGAGAGAG

1 strains Score : 3.98

gi|88853341:1-750 Human immunodeficiency virus type 1 complete genome, subtype A4, isolate 97CD.KCC2

---

CAATAGCCTGTTA CACCCTA TATGCCAACATGG

1 strains Score : 3.98

gi|88853341:1-750 Human immunodeficiency virus type 1 complete genome, subtype A4, isolate 97CD.KCC2

---

ATCCTGAGAGAGA AGTGTT AATGTGGAAGTTT

1 strains Score : 3.98

gi|88853341:1-750 Human immunodeficiency virus type 1 complete genome, subtype A4, isolate 97CD.KCC2

---

AAAGCTTGCCTTG AGTGCT TCAAGTAGTGTGT

1 strains Score : 3.98

gi|13897588|gb|AF254694.1| HIV-1 clone NT25.4/ from Tanzania 5' long terminal repeat, complete sequence

---

AAAGCTTGCCTTG AGTGCC TCAAGTAGTGTGT

1 strains Score : 3.98

gi|13897630|gb|AF254736.1| HIV-1 clone B36.2/ from Tanzania 5' long terminal repeat, complete sequence

---

TAGCCTCAATAAA GCTTGCC TTGAGTGCTTAAA

1 strains Score : 3.96

gi|13897627|gb|AF254733.1| HIV-1 clone B66.1/ from Tanzania 5' long terminal repeat, complete sequence

---

TAACGTTTGGATG GTGCTT CAAACTAGTACCA

1 strains Score : 3.66

gi|13897608|gb|AF254714.1| HIV-1 clone NT51/.17 from Tanzania 5' long terminal repeat, complete sequence

---

GAAGTTTGATAGC CGGCTGG CCTTTGAACACAA

1 strains Score : 3.66

gi|13897630|gb|AF254736.1| HIV-1 clone B36.2/ from Tanzania 5' long terminal repeat, complete sequence

---

ATTACACCCTATA TGCCAGCATG GAATGGATGATGA

1 strains Score : 3.66

gi|13897627|gb|AF254733.1| HIV-1 clone B66.1/ from Tanzania 5' long terminal repeat, complete sequence

---

AGAGACTCGAAAG CGAAAGTT CCAGAGAAGTTCT

1 strains Score : 3.66

gi|13897569|gb|AF254675.1| HIV-1 clone NT4.3/ from Tanzania 5' long terminal repeat, complete sequence

---

TAAGCCTCAATAA AAGCTT GCCTTGAGTGCTT

1 strains Score : 3.64

gi|88853341:1-750 Human immunodeficiency virus type 1 complete genome, subtype A4, isolate 97CD.KCC2

---

ATGCTGCATATAA GCAGCTGC TTTGCGCCTGTAC

1 strains Score : 3.64

gi|4336542|gb|AF096641.1| HIV-1 strain TZB0003 country Tanzania 5' long terminal repeat, complete sequence

---

GTGTTTCAAGCTA GTACCAG TTGATCCAGATGA

1 strains Score : 3.62

gi|13897627|gb|AF254733.1| HIV-1 clone B66.1/ from Tanzania 5' long terminal repeat, complete sequence

---

ATGGGTTAATTTG GTCCAGAAAGACAAGACAT

1 strains Score : 3.34

gi|88853341:1-750 Human immunodeficiency virus type 1 complete genome, subtype A4, isolate 97CD.KCC2

---

ATGAGGGAGAGAA CAACAGCT TATTACACCCTAT

1 strains Score : 3.34

gi|13897588|gb|AF254694.1| HIV-1 clone NT25.4/ from Tanzania 5' long terminal repeat, complete sequence

---

ATGAGGGAGAGAA CAACAGCC TATTACACCCTAT

1 strains Score : 3.34

gi|13897568|gb|AF254674.1| HIV-1 clone NT3.3/ from Tanzania 5' long terminal repeat, complete sequence

---

TCAAAGTAGTACC AGTTGAGC CAGATGAAGTAGA

1 strains Score : 3.32

gi|13897608|gb|AF254714.1| HIV-1 clone NT51/.17 from Tanzania 5' long terminal repeat, complete sequence

---

GGAAGTTTGATAG CCGGCTGG CCTTTGAACACAA

1 strains Score : 3.32

gi|13897630|gb|AF254736.1| HIV-1 clone B36.2/ from Tanzania 5' long terminal repeat, complete sequence

---

GAACAATAGCCTG TTACACCCTA TATGCCAACATGG

1 strains Score : 3.32

gi|88853341:1-750 Human immunodeficiency virus type 1 complete genome, subtype A4, isolate 97CD.KCC2

---

CTACAGTTGCATC CGGAGT TCTTCAAAGACTG

1 strains Score : 3.32

gi|13897630|gb|AF254736.1| HIV-1 clone B36.2/ from Tanzania 5' long terminal repeat, complete sequence

---

AAAGACAAGACAT CCTTGA TCTGTGGGTCTAT

1 strains Score : 3.32

gi|88853341:1-750 Human immunodeficiency virus type 1 complete genome, subtype A4, isolate 97CD.KCC2

---

AAAAGACAAGACA TCCTTGA TCTGTGGGTCTAT

1 strains Score : 3.32

gi|88853341:1-750 Human immunodeficiency virus type 1 complete genome, subtype A4, isolate 97CD.KCC2

---

AAAACACCGAGCC AAAGAGCTG CATCCGGAGTTCT

1 strains Score : 3.32

gi|13897608|gb|AF254714.1| HIV-1 clone NT51/.17 from Tanzania 5' long terminal repeat, complete sequence

---

TTGCTTGTA CTA GGTCTC TCTTGTTAGACCA

1 strains Score : 3.3

gi|13897569|gb|AF254675.1| HIV-1 clone NT4.3/ from Tanzania 5' long terminal repeat, complete sequence

---

TGATCCTGAGAGA GAAGTG TTAATGTGGAAGT

1 strains Score : 3.3

gi|88853341:1-750 Human immunodeficiency virus type 1 complete genome, subtype A4, isolate 97CD.KCC2

---

AGCCCTACAGTTG CATCCGGAG TTCTTCAAAGACT

1 strains Score : 3.3

gi|13897630|gb|AF254736.1| HIV-1 clone B36.2/ from Tanzania 5' long terminal repeat, complete sequence

---

ACGCTGCATATAA GCAGCCGC TTTTCGCCTGTAC

1 strains Score : 3.3

gi|13897568|gb|AF254674.1| HIV-1 clone NT3.3/ from Tanzania 5' long terminal repeat, complete sequence

---

TTGCTTGTACTA GGTCTCTCT TGTTAGACCAGAT

1 strains Score : 3.0

gi|13897569|gb|AF254675.1| HIV-1 clone NT4.3/ from Tanzania 5' long terminal repeat, complete sequence

---

TAAATGTGGAAGT TTGACAGC AAACCTGGCATTAA

1 strains Score : 2.98

gi|13897588|gb|AF254694.1| HIV-1 clone NT25.4/ from Tanzania 5' long terminal repeat, complete sequence

---

TAAAGCCCAATA AAGCTTGCC TTGAGTGCTTCAA

1 strains Score : 2.98

gi|13897588|gb|AF254694.1| HIV-1 clone NT25.4/ from Tanzania 5' long terminal repeat, complete sequence

---

TGAAACACAGAGC CCTAGAGCTG CATCCGGAGTTCT

1 strains Score : 2.98

gi|4336542|gb|AF096641.1| HIV-1 strain TZB0003 country Tanzania 5' long terminal repeat, complete sequence

---

TCAGACCACTTTA GACTGAG TAAAAATCTCTAG

1 strains Score : 2.98

gi|13897608|gb|AF254714.1| HIV-1 clone NT51/.17 from Tanzania 5' long terminal repeat, complete sequence

---

TAACATTTGGATG GTGTTT CAAGCTAGTACCA

1 strains Score : 2.98

gi|13897627|gb|AF254733.1| HIV-1 clone B66.1/ from Tanzania 5' long terminal repeat, complete sequence

---

TAACATTTGGATG GTGCTT CAAGCTAGAACCA

1 strains Score : 2.98

gi|13897630|gb|AF254736.1| HIV-1 clone B36.2/ from Tanzania 5' long terminal repeat, complete sequence

---

TAAAACACCGAGC CAAAGAGCTG CATCCGGAGTTCT

1 strains Score : 2.98

gi|13897608|gb|AF254714.1| HIV-1 clone NT51/.17 from Tanzania 5' long terminal repeat, complete sequence

---

CTAACGTTGTGGA TGGTGC TTCAAGCTAGTAC

1 strains Score : 2.98

gi|13897569|gb|AF254675.1| HIV-1 clone NT4.3/ from Tanzania 5' long terminal repeat, complete sequence

---

ATCCCTCAGACCA CCTTAG CAGAGTGAAAAAT

1 strains Score : 2.98

gi|88853341:1-750 Human immunodeficiency virus type 1 complete genome, subtype A4, isolate 97CD.KCC2

---

AGAAAAGACAAGA CATCCTTGA TCTGTGGGTCTAT

1 strains Score : 2.98

gi|88853341:1-750 Human immunodeficiency virus type 1 complete genome, subtype A4, isolate 97CD.KCC2

---

AAAGCTTGCCTTG AGTGCC TCAAGCAGTGTGT

1 strains Score : 2.98

gi|13897608|gb|AF254714.1| HIV-1 clone NT51/.17 from Tanzania 5' long terminal repeat, complete sequence

---

AAAGCTTGCCTTG AGTGAC TCAAGCAGTGTGT

1 strains Score : 2.98

gi|4336542|gb|AF096641.1| HIV-1 strain TZB0003 country Tanzania 5' long terminal repeat, complete sequence

---



AAAACĀCAGAGCĀ CTAGAGATG CĀTCCGGAGTTCT

1 strains Score : 2.98

gi|13897627|gb|AF254733.1| HIV-1 clone B66.1/ from Tanzania 5' long terminal repeat, complete sequence

---

AAAACĀCAGAGCĀ AAAGAGCTG CĀTCCGGAGTTCT

1 strains Score : 2.98

gi|88853341:1-750 Human immunodeficiency virus type 1 complete genome, subtype A4, isolate 97CD.KCC2

---

ATGGGTTAATTTG GTCCCA GAAAĀGACAĀGĀC

1 strains Score : 2.68

gi|88853341:1-750 Human immunodeficiency virus type 1 complete genome, subtype A4, isolate 97CD.KCC2

---

TCAAGCTAGTACC AGTTGATC CAGATGAAGTAGA

1 strains Score : 2.66

gi|13897627|gb|AF254733.1| HIV-1 clone B66.1/ from Tanzania 5' long terminal repeat, complete sequence

---

GTGAGTACGCCAA GAATTT TTGACTAGCGGAG

1 strains Score : 2.66

gi|13897569|gb|AF254675.1| HIV-1 clone NT4.3/ from Tanzania 5' long terminal repeat, complete sequence

---

AGAGACTCGAAAG CGAAAG TTCCĀGĀGĀGTT

1 strains Score : 2.66

gi|13897569|gb|AF254675.1| HIV-1 clone NT4.3/ from Tanzania 5' long terminal repeat, complete sequence

---

TAATGTGGAAGTT TGACAG CAAACTGGCĀTTA

1 strains Score : 2.64

gi|13897588|gb|AF254694.1| HIV-1 clone NT25.4/ from Tanzania 5' long terminal repeat, complete sequence

---

TAACATTTGGATG GTGCTT CAAGTTAGTACCA

1 strains Score : 2.64

gi|88853341:1-750 Human immunodeficiency virus type 1 complete genome, subtype A4, isolate 97CD.KCC2

---

TAAAGCCTCAATA AAGCTTGCC TTGAGTGA<sup>CT</sup>CAA

1 strains Score : 2.64

gi|4336542|gb|AF096641.1| HIV-1 strain TZB0003 country Tanzania 5' long terminal repeat, complete sequence

---

GTTCCCACTAACA TTTGGATGG TGCTTCAAGCTAG

1 strains Score : 2.64

gi|13897588|gb|AF254694.1| HIV-1 clone NT25.4/ from Tanzania 5' long terminal repeat, complete sequence

---

GTGAGTACGCCAA TTTTGA CTAGCGGAGGGTA

1 strains Score : 2.64

gi|13897608|gb|AF254714.1| HIV-1 clone NT51/.17 from Tanzania 5' long terminal repeat, complete sequence

---

GTGAGTACGCCAA TTTTGA CTAGCGGAGGCTA

1 strains Score : 2.64

gi|13897588|gb|AF254694.1| HIV-1 clone NT25.4/ from Tanzania 5' long terminal repeat, complete sequence

---

GTGAGTACGCCAA GAATTTTGA CTAGCGGAGGCTA

1 strains Score : 2.64

gi|13897569|gb|AF254675.1| HIV-1 clone NT4.3/ from Tanzania 5' long terminal repeat, complete sequence

---

GTGAGTACGCCAA ATTTTGA CTAGCGGAGGCTA

1 strains Score : 2.64

gi|13897630|gb|AF254736.1| HIV-1 clone B36.2/ from Tanzania 5' long terminal repeat, complete sequence

---

GTATCCACTAACG TTGTGGATGG TGCTTCAAGCTAG

1 strains Score : 2.64

gi|13897569|gb|AF254675.1| HIV-1 clone NT4.3/ from Tanzania 5' long terminal repeat, complete sequence

---

CCACTAACATTTG GATGGTGT TTCAAGCTAGTAC

1 strains Score : 2.64

gi|13897627|gb|AF254733.1| HIV-1 clone B66.1/ from Tanzania 5' long terminal repeat, complete sequence

---

ATTCCCATTAACA TTTGGATGG TGCTTCAAGCTAG

1 strains Score : 2.64

gi|13897630|gb|AF254736.1| HIV-1 clone B36.2/ from Tanzania 5' long terminal repeat, complete sequence

---

TTCCCTCTAACAT TTGGATGG TGCTTCAAGTTAG

1 strains Score : 2.62

gi|88853341:1-750 Human immunodeficiency virus type 1 complete genome, subtype A4, isolate 97CD.KCC2

---

CAAACCTAGTACCA GTTGAGCCAG ATGAAGTAGAGAA

1 strains Score : 2.62

gi|13897608|gb|AF254714.1| HIV-1 clone NT51/.17 from Tanzania 5' long terminal repeat, complete sequence

---

ATGTGGAAGTTTG ACAGCAGCCT GGCACGAAGACAC

1 strains Score : 2.34

gi|13897568|gb|AF254674.1| HIV-1 clone NT3.3/ from Tanzania 5' long terminal repeat, complete sequence

---

CCACTAACGTTTG GATGGTGCTT CAACTAGTACCA

1 strains Score : 2.32

gi|13897608|gb|AF254714.1| HIV-1 clone NT51/.17 from Tanzania 5' long terminal repeat, complete sequence

---

TTACACCCCTATAT GCCAGCATG GAATGGATGATGA

1 strains Score : 2.3

gi|13897627|gb|AF254733.1| HIV-1 clone B66.1/ from Tanzania 5' long terminal repeat, complete sequence

---

TAATGTGGAAGTT TGACAGC AAAGTGGCATTAA

1 strains Score : 2.3

gi|13897588|gb|AF254694.1| HIV-1 clone NT25.4/ from Tanzania 5' long terminal repeat, complete sequence

---

GAAAAGACAAGAC ATCCTT GATCTGTGGGTCT

1 strains Score : 2.3

gi|88853341:1-750 Human immunodeficiency virus type 1 complete genome, subtype A4, isolate 97CD.KCC2

---

AAGCCCAATAAA GCTTGCC TTGAGTGCTTCAA

1 strains Score : 2.3

gi|13897588|gb|AF254694.1| HIV-1 clone NT25.4/ from Tanzania 5' long terminal repeat, complete sequence

---

AGGTTTCCACTAA CATTGGATG GTGTTTCAAGCTA

1 strains Score : 2.28

gi|13897627|gb|AF254733.1| HIV-1 clone B66.1/ from Tanzania 5' long terminal repeat, complete sequence

---

ATGTGGAAGTTTG ACAGCCGCCT GGCCTAAAACAC

1 strains Score : 2.0

gi|13897608|gb|AF254714.1| HIV-1 clone NT51/.17 from Tanzania 5' long terminal repeat, complete sequence

---

ATGTGGAAGTTTĠ ACAGCCACCT ĠGCACCTAAAACĠC

1 strains Score : 2.0

gi|13897627|gb|AF254733.1| HIV-1 clone B66.1/ from Tanzania 5' long terminal repeat, complete sequence

---

TTĠGATĠĠCĠGAAGA AGTAGAGGAG ĠĠTACTĠGAGGGAG

1 strains Score : 1.98

gi|13897630|gb|AF254736.1| HIV-1 clone B36.2/ from Tanzania 5' long terminal repeat, complete sequence

---

ĠGACCTTTĠGGATĠ ĠTGCTA ĠAAGCTAGTGĠĠA

1 strains Score : 1.98

gi|13897568|gb|AF254674.1| HIV-1 clone NT3.3/ from Tanzania 5' long terminal repeat, complete sequence

---

AGAGAGAGAAĠA TTAATGTGGA ĠĠTTTĠGACAGĠAA

1 strains Score : 1.98

gi|4336542|gb|AF096641.1| HIV-1 strain TZB0003 country Tanzania 5' long terminal repeat, complete sequence

---

AAGACTĠCTĠĠAĠA CAGAAGGGAC TTTĠĠĠCTĠGGĠAC

1 strains Score : 1.98

gi|13897568|gb|AF254674.1| HIV-1 clone NT3.3/ from Tanzania 5' long terminal repeat, complete sequence

---

AAAGCTTĠĠCTTĠ AGTGCT ĠTGAGTAGTĠTĠT

1 strains Score : 1.98

gi|13897568|gb|AF254674.1| HIV-1 clone NT3.3/ from Tanzania 5' long terminal repeat, complete sequence

---

TGATCCAGATGAA GTAGAGAAGG CTAATGAGGGAGA

1 strains Score : 1.96

gi|13897627|gb|AF254733.1| HIV-1 clone B66.1/ from Tanzania 5' long terminal repeat, complete sequence

---

CTCAATAAAGCTT GCCTTGA GTGCTTAAAGTAG

1 strains Score : 1.96

gi|13897627|gb|AF254733.1| HIV-1 clone B66.1/ from Tanzania 5' long terminal repeat, complete sequence

---

TCAAGCTAGTACC AGTTGATC CAGAAGAAGTAGA

1 strains Score : 1.66

gi|13897569|gb|AF254675.1| HIV-1 clone NT4.3/ from Tanzania 5' long terminal repeat, complete sequence

---

TCAAGCTAGTACC AGTTGAGC CAGAAGAAGTAGA

1 strains Score : 1.66

gi|4336542|gb|AF096641.1| HIV-1 strain TZB0003 country Tanzania 5' long terminal repeat, complete sequence

---

ATGTGGAAGTTTG ACAGTCGCCT GGCATTAAAACAC

1 strains Score : 1.66

gi|88853341:1-750 Human immunodeficiency virus type 1 complete genome, subtype A4, isolate 97CD.KCC2

---

ATGTGGAAGTTTG ACAGCAAAC T GGCATTAAAGACAC

1 strains Score : 1.66

gi|13897588|gb|AF254694.1| HIV-1 clone NT25.4/ from Tanzania 5' long terminal repeat, complete sequence

---

ATATGCCAACATG GAATGGAT GATCCTGAGAGAG

1 strains Score : 1.66

gi|88853341:1-750 Human immunodeficiency virus type 1 complete genome, subtype A4, isolate 97CD.KCC2

---

TTAAGCCTCAATA AAAGCTTGCC TTGAGTGCTTCAA

1 strains Score : 1.64

gi|88853341:1-750 Human immunodeficiency virus type 1 complete genome, subtype A4, isolate 97CD.KCC2

---

TTAAAGCCTCAAT AAAGCTTGCC TTGAGTGACTCAA

1 strains Score : 1.64

gi|4336542|gb|AF096641.1| HIV-1 strain TZB0003 country Tanzania 5' long terminal repeat, complete sequence

---

TAAGTAGAGATCC CTCAGAC CACTCTAGACTGT

1 strains Score : 1.64

gi|4336542|gb|AF096641.1| HIV-1 strain TZB0003 country Tanzania 5' long terminal repeat, complete sequence

---

GAATGGATGATGA AGAGAGA GAGACATTAATGT

1 strains Score : 1.64

gi|13897608|gb|AF254714.1| HIV-1 clone NT51/.17 from Tanzania 5' long terminal repeat, complete sequence

---

CCTCTAACATTTG GATGGTGC TTCAAGTTAGTAC

1 strains Score : 1.64

gi|88853341:1-750 Human immunodeficiency virus type 1 complete genome, subtype A4, isolate 97CD.KCC2

---

CCACTAACGTTGT GGATGGTGC TTCAAGCTAGTAC

1 strains Score : 1.64

gi|13897569|gb|AF254675.1| HIV-1 clone NT4.3/ from Tanzania 5' long terminal repeat, complete sequence

---

ATGAGGGAGAGAA CAACAGCTTA TTACACCCTATAT

1 strains Score : 1.64

gi|13897588|gb|AF254694.1| HIV-1 clone NT25.4/ from Tanzania 5' long terminal repeat, complete sequence

---

ATGAGGGAGAGAA CAACAGCCTA TTACACCCTATAT

1 strains Score : 1.64

gi|13897568|gb|AF254674.1| HIV-1 clone NT3.3/ from Tanzania 5' long terminal repeat, complete sequence

---

ATGAGGGAGAGAA CAACAGC TTATTACACCCTA

1 strains Score : 1.64

gi|13897588|gb|AF254694.1| HIV-1 clone NT25.4/ from Tanzania 5' long terminal repeat, complete sequence

---

AGAACTCCACACC AGGGCCA GGAACCAGGTTTC

1 strains Score : 1.64

gi|13897627|gb|AF254733.1| HIV-1 clone B66.1/ from Tanzania 5' long terminal repeat, complete sequence

---

TGATCCAGAAGAA GTAGAGAAGG CTAATGAGGGAGA

1 strains Score : 1.62

gi|13897569|gb|AF254675.1| HIV-1 clone NT4.3/ from Tanzania 5' long terminal repeat, complete sequence

---

GTAAGTAGAGATC CCTCAGA CCACTTTAGACTG

1 strains Score : 1.62

gi|13897608|gb|AF254714.1| HIV-1 clone NT51/.17 from Tanzania 5' long terminal repeat, complete sequence

---

GATCCTGAGAGAG AAGTGTTA ATGTGGAAGTTTG

1 strains Score : 1.62

gi|88853341:1-750 Human immunodeficiency virus type 1 complete genome, subtype A4, isolate 97CD.KCC2

---

GAAAAGACAAGAC ATCCTTGATC TGTGGGTCCTATCA

1 strains Score : 1.62

gi|88853341:1-750 Human immunodeficiency virus type 1 complete genome, subtype A4, isolate 97CD.KCC2

---



CTATATGCCAGCA TGGGATGGA TGATGATGAGAAA

1 strains Score : 1.62

gi|13897588|gb|AF254694.1| HIV-1 clone NT25.4/ from Tanzania 5' long terminal repeat, complete sequence

---

TTGAGCCAGAAGA AGTAGAGAGA GCTACTGAGGGAG

1 strains Score : 1.32

gi|4336542|gb|AF096641.1| HIV-1 strain TZB0003 country Tanzania 5' long terminal repeat, complete sequence

---

GTTACACCCTATA TGCCAACATG GAATGGATGATCC

1 strains Score : 1.32

gi|88853341:1-750 Human immunodeficiency virus type 1 complete genome, subtype A4, isolate 97CD.KCC2

---

CTACAGTTGCATC CGGAGTTCT TCAAAGACTGCTG

1 strains Score : 1.32

gi|13897630|gb|AF254736.1| HIV-1 clone B36.2/ from Tanzania 5' long terminal repeat, complete sequence

---

CATCCTTGATCTG TGGGTCTAT CACACGCAAGGCT

1 strains Score : 1.32

gi|88853341:1-750 Human immunodeficiency virus type 1 complete genome, subtype A4, isolate 97CD.KCC2

---

ATCCAGAAGAAGT AGAGGAG GCTACTGAGGGAG

1 strains Score : 1.32

gi|13897630|gb|AF254736.1| HIV-1 clone B36.2/ from Tanzania 5' long terminal repeat, complete sequence

---

TTCCCATTAACAT TTGGATGG TGCTTCAAGCTAG

1 strains Score : 1.3

gi|13897630|gb|AF254736.1| HIV-1 clone B36.2/ from Tanzania 5' long terminal repeat, complete sequence

---

TAGTACCAGTTGA TCCAGA TGAAGTAGAGAAG

1 strains Score : 1.3

gi|13897627|gb|AF254733.1| HIV-1 clone B66.1/ from Tanzania 5' long terminal repeat, complete sequence

---

TAGTACCAGTTGA GCCAGA TGAAGTAGAGAAG

1 strains Score : 1.3

gi|13897608|gb|AF254714.1| HIV-1 clone NT51/.17 from Tanzania 5' long terminal repeat, complete sequence

---

NGACTGGTGAGTA CGCCAA TTTTGTGACTAGCG

1 strains Score : 1.3

gi|13897608|gb|AF254714.1| HIV-1 clone NT51/.17 from Tanzania 5' long terminal repeat, complete sequence

---

GGAACCAGGTTTC CACTAACATT TGGATGGTGTTTC

1 strains Score : 1.3

gi|13897627|gb|AF254733.1| HIV-1 clone B66.1/ from Tanzania 5' long terminal repeat, complete sequence

---

AGGGAGAGGATAA CAACCTA TTACACCCTATAT

1 strains Score : 1.3

gi|13897627|gb|AF254733.1| HIV-1 clone B66.1/ from Tanzania 5' long terminal repeat, complete sequence

---

AGCCCTAGAGATG CATCCGGAG TTCTACAAAGACT

1 strains Score : 1.3

gi|13897627|gb|AF254733.1| HIV-1 clone B66.1/ from Tanzania 5' long terminal repeat, complete sequence

---

ACACCCTATATGC CAGCATG GAATGGATGATGA

1 strains Score : 1.3

gi|13897627|gb|AF254733.1| HIV-1 clone B66.1/ from Tanzania 5' long terminal repeat, complete sequence

---

**AAGCCCTACAGTT GCATCCGGAG TTCCTTCAAAGACT**

1 strains Score : 1.3

gi|13897630|gb|AF254736.1| HIV-1 clone B36.2/ from Tanzania 5' long terminal repeat, complete sequence

---

**CTGCATATAAGCA GCTGCTT TTCGCTTGTACTA**

1 strains Score : 1.28

gi|13897569|gb|AF254675.1| HIV-1 clone NT4.3/ from Tanzania 5' long terminal repeat, complete sequence

---

**TTATAGCCTCAAT AAAGCTTGC CTTGAGTGCTTAA**

1 strains Score : 0.98

gi|13897627|gb|AF254733.1| HIV-1 clone B66.1/ from Tanzania 5' long terminal repeat, complete sequence

---

**TGTACTAGGTCTC TCTTGT TAGACCAGATCGA**

1 strains Score : 0.98

gi|13897569|gb|AF254675.1| HIV-1 clone NT4.3/ from Tanzania 5' long terminal repeat, complete sequence

---

**GTTACACCCTATA TGCCAACAT GGAATGGATGATC**

1 strains Score : 0.98

gi|88853341:1-750 Human immunodeficiency virus type 1 complete genome, subtype A4, isolate 97CD.KCC2

---

**CTGCTGACACAGA AGGGAC TTTCCGCTGGGAC**

1 strains Score : 0.98

gi|13897568|gb|AF254674.1| HIV-1 clone NT3.3/ from Tanzania 5' long terminal repeat, complete sequence

---

**ACCCACTGCTTAA GCCCAA TAAAGCTTGCCTT**

1 strains Score : 0.98

gi|13897588|gb|AF254694.1| HIV-1 clone NT25.4/ from Tanzania 5' long terminal repeat, complete sequence

---

---

**TTACAC<sup>•••</sup>CCCTATAT<sup>•</sup> GCCAGCATG G<sup>••</sup>GATGGATGATGA<sup>•••</sup>**

1 strains Score : 0.96

gi|13897588|gb|AF254694.1| HIV-1 clone NT25.4/ from Tanzania 5' long terminal repeat, complete sequence

---

**TTACAC<sup>•••</sup>CCCTATAT<sup>•</sup> GCCAGCAT GGAATGGATGATG<sup>•••</sup>**

1 strains Score : 0.96

gi|13897627|gb|AF254733.1| HIV-1 clone B66.1/ from Tanzania 5' long terminal repeat, complete sequence

---

**TTACAC<sup>•••</sup>CCCTATAT<sup>•</sup> GCCAACAT GGAATGGATGATC<sup>•••</sup>**

1 strains Score : 0.96

gi|88853341:1-750 Human immunodeficiency virus type 1 complete genome, subtype A4, isolate 97CD.KCC2

---

**TGGTCCCAGAAAA GACAAG ACATCCTTGATCT<sup>•••</sup>**

1 strains Score : 0.96

gi|88853341:1-750 Human immunodeficiency virus type 1 complete genome, subtype A4, isolate 97CD.KCC2

---

**TGGATGATGATGA GAAAGAAG TATTAATGTGGAA<sup>•••</sup>**

1 strains Score : 0.96

gi|13897588|gb|AF254694.1| HIV-1 clone NT25.4/ from Tanzania 5' long terminal repeat, complete sequence

---

TGAGAGAGAAACA TTAATG TGGAAGTTTGATA

1 strains Score : 0.96

gi|13897630|gb|AF254736.1| HIV-1 clone B36.2/ from Tanzania 5' long terminal repeat, complete sequence

---

TGACTCAAGCAGT GTGTGC CCATCTGTTGTTT

1 strains Score : 0.96

gi|4336542|gb|AF096641.1| HIV-1 strain TZB0003 country Tanzania 5' long terminal repeat, complete sequence

---

TAACTAGAGATCC CTCAGAC CACTTTAGACTGA

1 strains Score : 0.96

gi|13897608|gb|AF254714.1| HIV-1 clone NT51/.17 from Tanzania 5' long terminal repeat, complete sequence

---

GAATGGATGATGA GGAGAAA GAAGTATTAATGT

1 strains Score : 0.96

gi|13897627|gb|AF254733.1| HIV-1 clone B66.1/ from Tanzania 5' long terminal repeat, complete sequence

---

CTCAATAAAGCTT GCCTTGA GTGCCTCAAGTAG

1 strains Score : 0.96

gi|13897630|gb|AF254736.1| HIV-1 clone B36.2/ from Tanzania 5' long terminal repeat, complete sequence

---

CTCAATAAAGCTT GCCTTG AGTGCTTAAAGTA

1 strains Score : 0.96

gi|13897627|gb|AF254733.1| HIV-1 clone B66.1/ from Tanzania 5' long terminal repeat, complete sequence

---

CCAGAAAAGACAA GACATCC TTGATCTGTGGGT

1 strains Score : 0.96

gi|88853341:1-750 Human immunodeficiency virus type 1 complete genome, subtype A4, isolate 97CD.KCC2

---

ATGCTGCATATAA GCAGCTG CTTTCTGCTTGTA

1 strains Score : 0.96

gi|88853341:1-750 Human immunodeficiency virus type 1 complete genome, subtype A4, isolate 97CD.KCC2

---

AAGGAGAGAACA CAGCCTA TTACACCCTATAT

1 strains Score : 0.96

gi|13897608|gb|AF254714.1| HIV-1 clone NT51/.17 from Tanzania 5' long terminal repeat, complete sequence

---

TTCCCTCTAACAT TTGGATG GTGCTTCAAGTTA

1 strains Score : 0.94

gi|88853341:1-750 Human immunodeficiency virus type 1 complete genome, subtype A4, isolate 97CD.KCC2

---

ATGAGGGAGAGAA CAACAG CTTATTACACCCT

1 strains Score : 0.66

gi|13897588|gb|AF254694.1| HIV-1 clone NT25.4/ from Tanzania 5' long terminal repeat, complete sequence

---

AGGACTCGAAAG CGAAAG TTCCGGAGAAGTT

1 strains Score : 0.66

gi|4336542|gb|AF096641.1| HIV-1 strain TZB0003 country Tanzania 5' long terminal repeat, complete sequence

---

TGAGAGAGAAACA TTAATGTGGA AGTTTGACAGCAG

1 strains Score : 0.64

gi|13897568|gb|AF254674.1| HIV-1 clone NT3.3/ from Tanzania 5' long terminal repeat, complete sequence

---

CCATTAACATTTG GATGGTGCTT CAAGCTAGAACCA

1 strains Score : 0.64

gi|13897630|gb|AF254736.1| HIV-1 clone B36.2/ from Tanzania 5' long terminal repeat, complete sequence

---

CAGACCACTTTAG ACTGAG TAAAAATCTCTAG

1 strains Score : 0.64

gi|13897608|gb|AF254714.1| HIV-1 clone NT51/.17 from Tanzania 5' long terminal repeat, complete sequence

---

CAACTAGAGATCC CTCAGAC CACTCTAGACTGT

1 strains Score : 0.64

gi|13897568|gb|AF254674.1| HIV-1 clone NT3.3/ from Tanzania 5' long terminal repeat, complete sequence

---

TGACCCAAAGGAA GTGGAAGAGG CCAATGAGGGAGA

1 strains Score : 0.62

gi|13897568|gb|AF254674.1| HIV-1 clone NT3.3/ from Tanzania 5' long terminal repeat, complete sequence

---

TCCCTCTAACATT TGGATG GTGCTTCAAGTTA

1 strains Score : 0.62

gi|88853341:1-750 Human immunodeficiency virus type 1 complete genome, subtype A4, isolate 97CD.KCC2

---

TCCATTAACATT TGGATG GTGCTTCAAGCTA

1 strains Score : 0.62

gi|13897630|gb|AF254736.1| HIV-1 clone B36.2/ from Tanzania 5' long terminal repeat, complete sequence

---

TAGAACCAGTTGA TCCAGAAGAA GTAGAGGAGGCTA

1 strains Score : 0.62

gi|13897630|gb|AF254736.1| HIV-1 clone B36.2/ from Tanzania 5' long terminal repeat, complete sequence

---

CTGCATATAAGCA GCTGCTT TCTGCTTGTACTG

1 strains Score : 0.62

gi|88853341:1-750 Human immunodeficiency virus type 1 complete genome, subtype A4, isolate 97CD.KCC2

---

CTCAATAAAAGCT TGCCTTGAG TGCTTCAAGTGGT

1 strains Score : 0.62

gi|88853341:1-750 Human immunodeficiency virus type 1 complete genome, subtype A4, isolate 97CD.KCC2

---

CTCAATAAAAGCT TGCCTTGAG TGCTCTGAGTAGT

1 strains Score : 0.62

gi|13897568|gb|AF254674.1| HIV-1 clone NT3.3/ from Tanzania 5' long terminal repeat, complete sequence

---

CCAGAAAAGACAA GACATCCT TGATCTGTGGGTC

1 strains Score : 0.62

gi|88853341:1-750 Human immunodeficiency virus type 1 complete genome, subtype A4, isolate 97CD.KCC2

---

TTATAGCCTCAAT AAAGCTTGCC TTGAGTGCTTAAA

1 strains Score : 0.3

gi|13897627|gb|AF254733.1| HIV-1 clone B66.1/ from Tanzania 5' long terminal repeat, complete sequence

---

TGGTCCCAGAAA GACAAGA CATCCTTGATCTG

1 strains Score : 0.3

gi|88853341:1-750 Human immunodeficiency virus type 1 complete genome, subtype A4, isolate 97CD.KCC2

---

TCAGACCACTTTA GACTGAGTA AAAATCTCTAGCA

1 strains Score : 0.3

gi|13897608|gb|AF254714.1| HIV-1 clone NT51/.17 from Tanzania 5' long terminal repeat, complete sequence

---

TACTACACCCTAT GTGCCA ACATGGAATGGAT

1 strains Score : 0.3

gi|13897569|gb|AF254675.1| HIV-1 clone NT4.3/ from Tanzania 5' long terminal repeat, complete sequence

---



CTCAATAAAGCTT GCCTTGA GTGACTCAAGCAG

1 strains Score : 0.3

gi|4336542|gb|AF096641.1| HIV-1 strain TZB0003 country Tanzania 5' long terminal repeat, complete sequence

---

CGCTTTTCGCTTG TACTGGGTCT CTCTGGTAGACCA

1 strains Score : 0.3

gi|13897608|gb|AF254714.1| HIV-1 clone NT51/.17 from Tanzania 5' long terminal repeat, complete sequence

---

ACACCCTATATGC CAACATG GAATGGATGATCC

1 strains Score : 0.3

gi|88853341:1-750 Human immunodeficiency virus type 1 complete genome, subtype A4, isolate 97CD.KCC2

---

TGATCCAGAAGAA GTAGAGGAGG CTA CTGAGGGAGA

1 strains Score : 0.28

gi|13897630|gb|AF254736.1| HIV-1 clone B36.2/ from Tanzania 5' long terminal repeat, complete sequence

---

CTGCATATAAGCA GCTGCTT TTCGCTTG TACTG

1 strains Score : 0.28

gi|13897627|gb|AF254733.1| HIV-1 clone B66.1/ from Tanzania 5' long terminal repeat, complete sequence

---

CTGCATATAAGCA GCCGCTT TTCGCTTG TACTG

1 strains Score : 0.28

gi|13897608|gb|AF254714.1| HIV-1 clone NT51/.17 from Tanzania 5' long terminal repeat, complete sequence

---

CCCTCTAACATTT GGATGGTGCT TCAAGTTAGTACC

1 strains Score : 0.28

gi|88853341:1-750 Human immunodeficiency virus type 1 complete genome, subtype A4, isolate 97CD.KCC2

---

AAGCTGCATATAA GCAGCCGCTT TTCGCTTGTACTG

1 strains Score : 0.28

gi|13897608|gb|AF254714.1| HIV-1 clone NT51/.17 from Tanzania 5' long terminal repeat, complete sequence

---

TTGTA<sup>•</sup>CTAGG<sup>•</sup>TCT<sup>•</sup> CTCTTGT TAGAC<sup>•</sup>CAGAT<sup>•</sup>CGA

1 strains Score : -0.02

gi|13897569|gb|AF254675.1| HIV-1 clone NT4.3/ from Tanzania 5' long terminal repeat, complete sequence

---

TTGGTCCAGAAA AGACAAGA CATCC<sup>•</sup>TTGAT<sup>•</sup>CTG

1 strains Score : -0.02

gi|88853341:1-750 Human immunodeficiency virus type 1 complete genome, subtype A4, isolate 97CD.KCC2

---

CATCTGTTGTTT<sup>•</sup>G ACTCTG GTAAC<sup>•</sup>TAGAGAT<sup>•</sup>C

1 strains Score : -0.02

gi|4336542|gb|AF096641.1| HIV-1 strain TZB0003 country Tanzania 5' long terminal repeat, complete sequence

---

AGCCAGAAGAAGT AGAGAGA GCTACTGAGGGAG

1 strains Score : -0.02

gi|4336542|gb|AF096641.1| HIV-1 strain TZB0003 country Tanzania 5' long terminal repeat, complete sequence

---

TGTTTCAAGCTAG TACCAGT TGATCCAGATGAA

1 strains Score : -0.04

gi|13897627|gb|AF254733.1| HIV-1 clone B66.1/ from Tanzania 5' long terminal repeat, complete sequence

---

TGCTTCAAGCTAG TACCAGT TGATCCAGAAGAA

1 strains Score : -0.04

gi|13897569|gb|AF254675.1| HIV-1 clone NT4.3/ from Tanzania 5' long terminal repeat, complete sequence

---

TGCTTCAAGCTAG AACCAGT TGATCCAGAAGAA

1 strains Score : -0.04

gi|13897630|gb|AF254736.1| HIV-1 clone B36.2/ from Tanzania 5' long terminal repeat, complete sequence

---

TAGTACCAGTTGA GCCAGAAGAA GTAGAGAGAGCTA

1 strains Score : -0.04

gi|4336542|gb|AF096641.1| HIV-1 strain TZB0003 country Tanzania 5' long terminal repeat, complete sequence

---

TACCAGTTGATCC AGATGAA GTAGAGAAGGCTA

1 strains Score : -0.04

gi|13897627|gb|AF254733.1| HIV-1 clone B66.1/ from Tanzania 5' long terminal repeat, complete sequence

---

TACCAGTTGATCC AGAAGCA GTAGAGAAGGCTA

1 strains Score : -0.04

gi|13897588|gb|AF254694.1| HIV-1 clone NT25.4/ from Tanzania 5' long terminal repeat, complete sequence

---

TACCAGTTGATCC AGAAGAA GTAGAGAAGGCTA

1 strains Score : -0.04

gi|13897569|gb|AF254675.1| HIV-1 clone NT4.3/ from Tanzania 5' long terminal repeat, complete sequence

---

GTGCCTCAAGTAG TGTGTGC CCGTCTGTTGTAT

1 strains Score : -0.04

gi|13897630|gb|AF254736.1| HIV-1 clone B36.2/ from Tanzania 5' long terminal repeat, complete sequence

---

GAGCCCTAGAGAT GCATCCGGAG TTCTACAAAGACT

1 strains Score : -0.04

gi|13897627|gb|AF254733.1| HIV-1 clone B66.1/ from Tanzania 5' long terminal repeat, complete sequence

---

AGCCTCAATAAAG CTTGCCTTG AGTGCTTAAAGTA

1 strains Score : -0.04

gi|13897627|gb|AF254733.1| HIV-1 clone B66.1/ from Tanzania 5' long terminal repeat, complete sequence

---

ACACCCATATATGC CAGCATG GGATGGATGATGA

1 strains Score : -0.04

gi|13897588|gb|AF254694.1| HIV-1 clone NT25.4/ from Tanzania 5' long terminal repeat, complete sequence

---

GACCACTCGAGAC CGTGTA AAA TTCTCTAGCAGTG

1 strains Score : -0.36

gi|13897569|gb|AF254675.1| HIV-1 clone NT4.3/ from Tanzania 5' long terminal repeat, complete sequence

---

TGCTACAAGCTAG TGCCAG TTGACCCAAAGGA

1 strains Score : -0.38

gi|13897568|gb|AF254674.1| HIV-1 clone NT3.3/ from Tanzania 5' long terminal repeat, complete sequence

---

TGAGCCAGAAGAA GTAGAGAGAG CTA CTGAGGGAGA

1 strains Score : -0.38

gi|4336542|gb|AF096641.1| HIV-1 strain TZB0003 country Tanzania 5' long terminal repeat, complete sequence

---

GACCTTTGGATGG TGCTACAAG CTAGTGCCAGTTG

1 strains Score : -0.38

gi|13897568|gb|AF254674.1| HIV-1 clone NT3.3/ from Tanzania 5' long terminal repeat, complete sequence

---

TGGATGATGAAGA GAGAGAGA CATTAAATGTGGAA

1 strains Score : -0.7

gi|13897608|gb|AF254714.1| HIV-1 clone NT51/.17 from Tanzania 5' long terminal repeat, complete sequence

---

AACTCCACACCAG GGCAGGGAC CAGATTCCCATTA

1 strains Score : -0.7

gi|13897630|gb|AF254736.1| HIV-1 clone B36.2/ from Tanzania 5' long terminal repeat, complete sequence

---

TGACTCAAGCAGT GTGTGCC ATCTGTTGTTTGA

1 strains Score : -0.72

gi|4336542|gb|AF096641.1| HIV-1 strain TZB0003 country Tanzania 5' long terminal repeat, complete sequence

---

AGGTTCCCACTAA CGTTTGGATG GTGCTTCAAATA

1 strains Score : -0.72

gi|13897608|gb|AF254714.1| HIV-1 clone NT51/.17 from Tanzania 5' long terminal repeat, complete sequence

---

AAGCTGCATATAA GCAGCCG CTTTTCGCTTGTA

1 strains Score : -0.72

gi|13897608|gb|AF254714.1| HIV-1 clone NT51/.17 from Tanzania 5' long terminal repeat, complete sequence

---

TGCTTCAAGCTAG TACCAGT TGAGCCAGAAGAA

1 strains Score : -1.04

gi|4336542|gb|AF096641.1| HIV-1 strain TZB0003 country Tanzania 5' long terminal repeat, complete sequence

---

TGCTTCAAGCTAG TACCAGT TGATCCAGAAGCA

1 strains Score : -1.38

gi|13897588|gb|AF254694.1| HIV-1 clone NT25.4/ from Tanzania 5' long terminal repeat, complete sequence

---

TGCTTCAAATAAG TACCAGT TGAGCCAGATGAA

1 strains Score : -1.38

gi|13897608|gb|AF254714.1| HIV-1 clone NT51/.17 from Tanzania 5' long terminal repeat, complete sequence

---

TATTACACCCTAT ATGCCAGCAT GGAATGGATGATG

1 strains Score : -1.38

gi|13897627|gb|AF254733.1| HIV-1 clone B66.1/ from Tanzania 5' long terminal repeat, complete sequence

---

TTCTACAAAGACT GCTGACACAG AAGTTGCTGACAA

1 strains Score : -1.7

gi|13897627|gb|AF254733.1| HIV-1 clone B66.1/ from Tanzania 5' long terminal repeat, complete sequence

---

TCTACAAAGACTG CTGACACAG AAGTTGCTGACAA

1 strains Score : -1.7

gi|13897627|gb|AF254733.1| HIV-1 clone B66.1/ from Tanzania 5' long terminal repeat, complete sequence

---

GAGCCCTAGAGAT GCATCCGG AGTTCTACAAAGA

1 strains Score : -1.7

gi|13897627|gb|AF254733.1| HIV-1 clone B66.1/ from Tanzania 5' long terminal repeat, complete sequence

---

TTCCCATTAACAT TTGGATG GTGCTTCAAGCTA

1 strains Score : -1.72

gi|13897630|gb|AF254736.1| HIV-1 clone B36.2/ from Tanzania 5' long terminal repeat, complete sequence

---

TGGATGATGATGA GAAAGAA GTATTAATGTGGA

1 strains Score : -1.72

gi|13897588|gb|AF254694.1| HIV-1 clone NT25.4/ from Tanzania 5' long terminal repeat, complete sequence

---

TCCCAGAAAAGAC AAGACATCC TTGATCTGTGGGT

1 strains Score : -1.72

gi|88853341:1-750 Human immunodeficiency virus type 1 complete genome, subtype A4, isolate 97CD.KCC2

---

TAGCCCGAGAGAT GCATCCGG AGTTCTACAAAGA

1 strains Score : -2.04

gi|13897588|gb|AF254694.1| HIV-1 clone NT25.4/ from Tanzania 5' long terminal repeat, complete sequence

---
