# Supplementary material for: SeLOX—a locus of recombination site search tool for the detection and directed evolution of site-specific recombination systems
Source: PubMed Central journal article supplement — Nucleic Acids Res. 2010 Jun 6;38(Web Server issue):W293–8. doi: 10.1093/nar/gkq523 (PMC2896191; doi:10.1093/nar/gkq523), 2010-06-06
Supplement: gkq523_3.pdf [file gkq523_3.pdf]

# SeLOX

A search tool for recombinase lox-like target sites

[Home](#)

[Workflow](#)

[About](#)

[Sample Data](#)

[Contact](#)

You looked for

**A<sub>G</sub> | A<sub>G</sub> | A<sub>T</sub> | T<sub>C</sub> | A<sub>G</sub> | G<sub>T</sub> | A<sub>T</sub> | A | A | G | G | A | A**

## 28 lox-like Sequences found :

Dots on top of the nucleotides indicate mismatches with the query pattern, those right of the spacer being reverse complement mismatches. Dots below nucleotides indicate asymmetry in the right arm of the lox-site to the corresponding positions on the left arm of the lox-site

**ACAGGGACTCGAA AGCGAAAG TTCCAGAGAAGTT**

5 strains Score : 4.34

gi|13897568|gb|AF254674.1| HIV-1 clone NT3.3/ from Tanzania 5' long terminal repeat, complete sequence  
gi|13897588|gb|AF254694.1| HIV-1 clone NT25.4/ from Tanzania 5' long terminal repeat, complete sequence  
gi|13897608|gb|AF254714.1| HIV-1 clone NT51/.17 from Tanzania 5' long terminal repeat, complete sequence  
gi|13897627|gb|AF254733.1| HIV-1 clone B66.1/ from Tanzania 5' long terminal repeat, complete sequence  
gi|13897630|gb|AF254736.1| HIV-1 clone B36.2/ from Tanzania 5' long terminal repeat, complete sequence

**TGAGGGAGAGAAC AACAGCCTA TTACACCCTATAT**

2 strains Score : 3.0

gi|13897568|gb|AF254674.1| HIV-1 clone NT3.3/ from Tanzania 5' long terminal repeat, complete sequence  
gi|13897630|gb|AF254736.1| HIV-1 clone B36.2/ from Tanzania 5' long terminal repeat, complete sequence

**AGGGAGAGAACAA CAGCCTA TTACACCCTATAT**

2 strains Score : 2.66

gi|13897568|gb|AF254674.1| HIV-1 clone NT3.3/ from Tanzania 5' long terminal repeat, complete sequence  
gi|13897630|gb|AF254736.1| HIV-1 clone B36.2/ from Tanzania 5' long terminal repeat, complete sequence

-----

**AATGGATGATGAT GAGAGAGA AACATTAATGTGG**

2 strains Score : 2.66

gi|13897568|gb|AF254674.1| HIV-1 clone NT3.3/ from Tanzania 5' long terminal repeat, complete sequence

gi|13897630|gb|AF254736.1| HIV-1 clone B36.2/ from Tanzania 5' long terminal repeat, complete sequence

---

**GGATGGTGCTTCA AGCTAG TACCAGTTGATCC**

2 strains Score : 1.0

gi|13897569|gb|AF254675.1| HIV-1 clone NT4.3/ from Tanzania 5' long terminal repeat, complete sequence

gi|13897588|gb|AF254694.1| HIV-1 clone NT25.4/ from Tanzania 5' long terminal repeat, complete sequence

---

**CCAGGGCCAGGAA CCAGGT TTCCACTAACATT**

1 strains Score : 6.32

gi|13897627|gb|AF254733.1| HIV-1 clone B66.1/ from Tanzania 5' long terminal repeat, complete sequence

---

**GACTCGAAAGCGA AAGTAAAAG TTCCAGAGAAGTT**

1 strains Score : 6.0

gi|88853341:1-750 Human immunodeficiency virus type 1 complete genome, subtype A4, isolate 97CD.KCC2

---

**ACACAGAAGGGAC TTTCCGCTG GGACTTTCCACTG**

1 strains Score : 6.0

gi|13897568|gb|AF254674.1| HIV-1 clone NT3.3/ from Tanzania 5' long terminal repeat, complete sequence

---

**AGCTACTGAGGGA GAGAACAACA TCCTATTACACCC**

1 strains Score : 5.32

gi|4336542|gb|AF096641.1| HIV-1 strain TZB0003 country Tanzania 5' long terminal repeat, complete sequence

---

**TGAGGGAGAGGAT AACCAACCTA TTACACCCTATAT**

1 strains Score : 5.0

gi|13897627|gb|AF254733.1| HIV-1 clone B66.1/ from Tanzania 5' long terminal repeat, complete sequence

---

**GACTGGT**<sup>.</sup>**GAGTAC**<sup>.</sup> **GCCAAGAA** **TTTTT**<sup>.</sup>**GACTAGCG**<sup>.</sup>

1 strains Score : 4.34

gi|13897569|gb|AF254675.1| HIV-1 clone NT4.3/ from Tanzania 5' long terminal repeat, complete sequence

---

**GACTGGT**<sup>.</sup>**GAGTAC**<sup>.</sup> **GCCAAAT** **TTTTT**<sup>.</sup>**GACTAGCG**<sup>.</sup>

1 strains Score : 4.34

gi|13897630|gb|AF254736.1| HIV-1 clone B36.2/ from Tanzania 5' long terminal repeat, complete sequence

---

**ACAGGGACTCGAA** **AGCGAAAG** **TTCCG**<sup>.</sup>**GAGAAAGTT**<sup>.</sup>

1 strains Score : 4.34

gi|4336542|gb|AF096641.1| HIV-1 strain TZB0003 country Tanzania 5' long terminal repeat, complete sequence

---

**ACAGAGACTCGAA** **AGCGAAAG** **TTCCAG**<sup>.</sup>**GAGAAAGTT**<sup>.</sup>

1 strains Score : 4.0

gi|13897569|gb|AF254675.1| HIV-1 clone NT4.3/ from Tanzania 5' long terminal repeat, complete sequence

---

**CAC**<sup>.</sup>**TGTTAAGCCT**<sup>.</sup> **CAATAAAGCT** **TGCCTT**<sup>.</sup>**GAGTGCC**<sup>.</sup>

1 strains Score : 3.98

gi|13897630|gb|AF254736.1| HIV-1 clone B36.2/ from Tanzania 5' long terminal repeat, complete sequence

---

**AGAAGTTGCTGAC** **AGGGACT** **TTCCG**<sup>.</sup>**CTGGGACT**<sup>.</sup>

1 strains Score : 3.32

gi|88853341:1-750 Human immunodeficiency virus type 1 complete genome, subtype A4, isolate 97CD.KCC2

---

**TGAGGGAGAGAAC** **AACATCCTA** **TTACAC**<sup>.</sup>**CCCTATAT**<sup>.</sup>

1 strains Score : 3.0

gi|4336542|gb|AF096641.1| HIV-1 strain TZB0003 country Tanzania 5' long terminal repeat, complete sequence

---

-----

**TGAGGGAGAGAAC AACAGCTTA TTACACCCTATAT**

1 strains Score : 3.0

gi|13897588|gb|AF254694.1| HIV-1 clone NT25.4/ from Tanzania 5' long terminal repeat, complete sequence

---

**CGAAGGAGAGAAC AACAGCCTA TTACACCCTATAT**

1 strains Score : 3.0

gi|13897608|gb|AF254714.1| HIV-1 clone NT51/.17 from Tanzania 5' long terminal repeat, complete sequence

---

**AAGGAGAGAACA CAGCCTA TTACACCCTATAT**

1 strains Score : 3.0

gi|13897608|gb|AF254714.1| HIV-1 clone NT51/.17 from Tanzania 5' long terminal repeat, complete sequence

---

**GGCTACTGAGGGA GAGAACAACA GCCTATTACACCC**

1 strains Score : 2.98

gi|13897630|gb|AF254736.1| HIV-1 clone B36.2/ from Tanzania 5' long terminal repeat, complete sequence

---

**GGCTAATGAGGGA GAGGATAACA ACCTATTACACCC**

1 strains Score : 2.98

gi|13897627|gb|AF254733.1| HIV-1 clone B66.1/ from Tanzania 5' long terminal repeat, complete sequence

---

**AGGGAGAGAACA CATCCTA TTACACCCTATAT**

1 strains Score : 2.66

gi|4336542|gb|AF096641.1| HIV-1 strain TZB0003 country Tanzania 5' long terminal repeat, complete sequence

---

**AGGGAGAGAACA CAGCTTA TTACACCCTATAT**

1 strains Score : 2.66

gi|13897588|gb|AF254694.1| HIV-1 clone NT25.4/ from Tanzania 5' long terminal repeat, complete sequence

---

**GGGGAGAGAACA TAGCCTG TTACACCCTATAT**

1 strains Score : 2.32

gi|88853341:1-750 Human immunodeficiency virus type 1 complete genome, subtype A4, isolate 97CD.KCC2

---

AGAGAAACATTAA TGTGGAAGT TTGATAGCCGGCT

1 strains Score : 2.32

gi|13897630|gb|AF254736.1| HIV-1 clone B36.2/ from Tanzania 5' long terminal repeat, complete sequence

---

GGATGGTGTTTCA AGCTAG TACCAGTTGATCC

1 strains Score : 1.0

gi|13897627|gb|AF254733.1| HIV-1 clone B66.1/ from Tanzania 5' long terminal repeat, complete sequence

---

GGCTACTGGGGGA GAGAACAATA GCCTGTTACACCC

1 strains Score : 0.98

gi|88853341:1-750 Human immunodeficiency virus type 1 complete genome, subtype A4, isolate 97CD.KCC2

---
